1 **Manuscript type:** Article

2 **Title:** Breakout Rooms, Polling, and Chat, Oh My! The Development and Validation of Online

3 COPUS

4 **Running title:** Development and Validation of E-COPUS

5 **Number of characters with spaces:** 71,167

6

7 Téa S. Pusey<sup>1\*</sup>, Andrea Presas Valencia<sup>1\*</sup>, and Adriana Signorini<sup>1\*</sup>, and Petra Kranzfelder<sup>2\*#</sup>

8 <sup>1</sup>Center for Engaged Teaching and Learning, Students Assessing Teaching and Learning

9 (SATAL) Program, University of California, Merced, CA, USA

10 <sup>2</sup>Molecular and Cellular Biology, University of California, Merced, CA, USA

11 \*Equal Contribution

12 #Corresponding author

13 Petra Kranzfelder

14 University of California Merced

15 School of Natural Sciences

16 Science and Engineering Building 1, Ste 370

17 5200 North Lake Road

18 Merced, CA, 95343, USA

19 Email: [pkranzfelder@ucmerced.edu](mailto:pkranzfelder@ucmerced.edu); ORD ID: <https://orcid.org/0000-0003-4146-7929>

20 Phone: (209) 228-3508

21

22 **Keywords:** undergraduate, classroom observation protocol, student-centered pedagogies, online

23 instruction, professional development

## 24 **Abstract**

25 We developed and validated a new classroom observation protocol, Online COPUS (E-COPUS),  
26 to measure teaching and learning practices in the online learning environment. We collected  
27 COPUS and E-COPUS data from 40 STEM courses before, during the transition, and  
28 continuation of emergency remote teaching (ERT). Through weekly discussions among  
29 observers, we adjusted six of the original instructor COPUS code descriptions and six of the  
30 original student code descriptions to fit the online learning environment. We trained 23 observers  
31 to conduct E-COPUS utilizing both in-person and online lecture recordings. To validate E-  
32 COPUS, we consulted an expert panel of science educators and education researchers to provide  
33 feedback on our code descriptions and complete a matching activity with our E-COPUS code  
34 descriptions. We further examined E-COPUS by analyzing the teaching and learning practices of  
35 6 instructors across in-person and online instruction and found that the online functions of  
36 breakout rooms, polling, and the chat were utilized to promote active learning activities in the  
37 online learning environment. As we prepare for teaching in the future, it is important to have  
38 formative assessment tools designed for all course formats to support assessment and  
39 improvement of teaching practices in college STEM classrooms.

40

## 41 **Introduction**

### 42 **Disruptive Events Led to Innovative Pedagogical Approaches**

43 Online teaching is fundamentally distinct from teaching in-person and requires instructors  
44 to develop a new set of skills (Davis & Snyder, 2012; Johnston et al., 2005; Juan et al., 2011;  
45 Mayer, 2005). For example, effective online instruction requires thoughtful instructional  
46 strategies and course design with a variety of assignments and learning activities (Yang, 2017).  
47 There are typically two main classroom formats that have been used during online instruction:  
48 synchronous and asynchronous (Reinholz et al., 2020; Skylar, 2009). Some instructors may  
49 choose to implement a synchronous classroom format (e.g., videoconference call or live online  
50 sessions) to encourage student-instructor interactions and group work in the online learning  
51 environment (Heiss & Oxley, 2021; Van Heuvelen et al., 2020). However, teaching in a  
52 synchronous format does not guarantee student participation; for example, Reinholz et al. (2020)  
53 found an overall decrease in student participation in biology classrooms as the class transitioned  
54 from in-person to synchronous instruction during emergency remote teaching (ERT). In contrast,  
55 instructors may choose an asynchronous format (e.g., recorded lectures, discussion boards, and  
56 at-home assignments) if they are concerned about their students' abilities to attend live online  
57 lectures (Van Heuvelen et al., 2020). While asynchronous instruction is an equitable practice for  
58 students who cannot attend synchronous lectures, it may reduce some of the student-instructor  
59 and student-student interactions that can occur in synchronous lectures (Van Heuvelen et al.,  
60 2020). Furthermore, synchronous lectures, which incorporate active learning activities, have  
61 been shown to support equity issues, such as less withdrawal rates among underrepresented  
62 student groups (Venton & Pompano, 2021b).

63 As the global pandemic forced instructors to rapidly transition to ERT, instructors  
64 adopted new teaching practices to adjust to the circumstances (Rapanta et al., 2020). However,

65 the transition from an in-person to online learning environment mid-course presented many  
66 challenges, including maintaining active student engagement (Giordano & Christopher, 2020).  
67 As a result, some instructors were not able to implement best teaching practices for online  
68 learning (Youmans, 2020), but others approached this challenge with creativity leading to  
69 opportunities for classroom pedagogical innovations, including adaptations of active learning  
70 strategies.

71 **Active learning engages students in the learning process, but online learning calls for new**  
72 **assessment tools**

73 Active learning is an evidence-based teaching practice which requires students to engage  
74 cognitively and meaningfully with the course materials (Armbruster et al., 2009; Bransford et al.,  
75 1999; Chi & Wylie, 2014; Driessen et al., 2020). There are many benefits associated with the  
76 implementation of active learning pedagogies (Chickering & Gamson, 1987; Crouch & Mazur,  
77 2001; Freeman et al., 2014; Hake, 1998; Knight & Wood, 2005; Maciejewski, 2016; Ong et al.,  
78 2011; Prince, 2004; Ruiz-Primo et al., 2011; Singer & Smith, 2013; Smith et al., 2005; Tomkin  
79 et al., 2019) as they are practices that improve learning for all students, particularly persons  
80 excluded because of their ethnicity or race, otherwise known as “PEER” (Asai, 2020). Therefore,  
81 shifting large numbers of Science, Technology, Engineering, and Mathematics (STEM) faculty  
82 to include even small amounts of active learning in their teaching may effectively educate far  
83 more students and raise retention of undergraduate STEM students (Owens et al., 2017).  
84 Recently, Denaro et al. (2021) noted a national focus on implementing evidence-based teaching  
85 practices to improve the quality of STEM education promoted by, among others, the National  
86 Research Council (2012), Olson and Riordan (2012), and AAAS (2019).

87           During the COVID-19 pandemic, there have been a few studies that have documented  
88 how active learning has been implemented during online instruction. To recreate active learning  
89 activities that were administered before ERT, Tan et al. (2020) utilized the Zoom breakout room  
90 function, which creates small videocall rooms within the main meeting, as well as Padlet, a  
91 virtual whiteboard. In pre-assigned breakout rooms, students would have discussions facilitated  
92 by an instructor or teaching assistant who were present in each breakout room. By asking  
93 students to turn their microphone functions on, groups were highly engaged in discussions.  
94 Singhal (2020) also utilized breakout rooms when assigning group active learning activities and  
95 moved between groups as they worked collaboratively.

96           Tan et al. (2020) also utilized Poll Everywhere, an online tool for live polling to actively  
97 engage students during synchronous instruction. Similarly, Christianson (2020) utilized  
98 Socrative, another online tool for live polling, to assign her students group quizzes at the  
99 beginning of class. During the administration of the quiz, students used Microsoft Teams to  
100 engage in group discussion on the quiz questions. Tan et al. (2020) found that the Zoom chat  
101 function, a messaging system within the video call room that allows for participants to send  
102 messages to the group or direct messages to each other, was valuable to maintain interactions  
103 among faculty, teacher assistants, and undergraduates in the course. Researchers also found that  
104 students in the course seemed to respond to more questions and participate more in the chat  
105 compared to in-person observations. In a large-enrollment biochemistry course, Dingwall (2020)  
106 designed templates for metabolic pathway templates that students could actively fill out during  
107 lecture. Students agreed that these templates were useful in the online learning environment  
108 because it allowed them to engage in lecture material rather than passively listen to their  
109 instructor. Therefore, while there have been studies documenting what tools were successful in

110 implementing active learning activities in the online learning environment (Christianson, 2020;  
111 Dingwall, 2020; Singhal, 2020; Tan et al., 2020), studies have not been conclusive about how or  
112 what tools to utilize to document the specific teaching and learning practices adapted in the  
113 online learning environment.

#### 114 **Classroom observation protocols**

115 An array of tools have been developed over the past two decades to measure active  
116 teaching pedagogies, especially in STEM courses (Eddy et al., 2015; Owens et al., 2017; Sawada  
117 et al., 2002; Smith et al., 2013). Self-report surveys alone or in combination with classroom  
118 observations is one method to measure the teaching practices of university instructors (AAAS,  
119 2019; Van der Lans et al., 2018). While surveys and interviews are useful in capturing  
120 instructor's personal experiences about implementing active learning, instructors may perceive  
121 themselves to be using more active learning pedagogies than they really are in their classrooms  
122 (Ebert-May et al., 2011; Van der Lans et al., 2018). In contrast, reliable and validated classroom  
123 observation protocols have been developed to objectively support instructors as they implement  
124 and reflect on their active learning activities. To name a few, the Practical Observation Rubric  
125 To Assess Active Learning (PORTAAL) (Eddy et al., 2015), the Decibel Analysis for Research  
126 in Teaching (DART) (Owens et al., 2017), the Reformed Teaching Observation Protocol (RTOP)  
127 (Sawada et al., 2002), and the Classroom Observation Protocol for Undergraduate STEM  
128 (COPUS) (Smith et al., 2013) provide a way of collecting unbiased data by a trained third-party  
129 or an application, like the Generalized Observation and Reflection Platform (GORP) (Tomkin et  
130 al., 2019; University of California Davis, 2018; Van der Lans et al., 2018). However, COPUS  
131 provides an objective account of the amount of active learning occurring in the classroom (Smith  
132 et al., 2013). Also, it has been a useful tool to document in-person active learning activities at

133 different levels, such as at the department (Kranzfelder et al., 2020), the institutional (Smith et  
134 al., 2014), and at multi-institutional levels (Akiha et al., 2018; Smith et al., 2013; Stains et al.,  
135 2018), as well as to document the impacts of educational initiatives for research (Akiha et al.,  
136 2018; Lund et al., 2015; Stains et al., 2018), professional development (Reisner et al., 2020;  
137 Tomkin et al., 2019), and tenure, merit, and promotion (Reisner et al., 2020). COPUS findings  
138 have also been clustered in different ways to compare results (Denaro et al., 2021) and has been  
139 used in combination with other tools, such the Classroom Discourse Observation Protocol  
140 (CDOP), (Kranzfelder, Bankers-Fulbright, et al., 2019). Moreover, COPUS results can be  
141 offered as an instructor-friendly visual representation documenting the frequency of instructors’  
142 use of active learning practices for different purposes (Kranzfelder et al., 2020; Reisner et al.,  
143 2020; Smith et al., 2014).

#### 144 **Transitioning to E- COPUS during ERT**

145 During ERT, instructors, institutional assessment programs, and biology education  
146 researchers faced a problem of not having a reliable, validated classroom observation tool that  
147 could be easily implemented online by trained observers to measure active learning. Although  
148 adjusting the original COPUS code descriptions to fit the online learning environment may seem  
149 like a seamless transition, many universities stopped conducting COPUS during online  
150 instruction due to its complexities. For instance, UC Irvine stopped conducting COPUS in the  
151 online learning environment because they “were lacking the resources to validate a novel  
152 observation protocol in the face of the numerous other COVID-19-related challenges” (personal  
153 communication with Brian Sato, 07/20/2021). Additionally, UC San Diego commented: “We had  
154 trained undergrads to do the observations and didn’t think we could ask them on the fly to adjust  
155 things” (personal communication with Melinda Owens, 07/20/2021). Some institutions utilized

156 COPUS as an assessment tool to support instructors while transitioning to ERT (Clark et al.,  
157 2020); however, they did not validate the tool for this new study context (i.e. online learning  
158 environment). Therefore, out of necessity, we developed a reliable and validated observation  
159 protocol to document online synchronous practices and online functions that instructors may use  
160 into their future teaching. By adapting COPUS for the online learning environment, instructors  
161 will have the ability to make comparisons between past, present, and future teaching practices as  
162 we move to other instructional modalities, such as in-person, Hybrid, or Hybrid-Flexible  
163 (HyFlex) (Beatty, 2019). This case study documents the development and validation of Online  
164 COPUS (E-COPUS) and showcases an analysis of in-person COPUS data and E-COPUS data.

## 165 **Case Study**

166 This study was approved by UC Merced's Institutional Review Board, and all  
167 participating instructors provided informed consent to anonymously participate in the study  
168 (Protocol ID UCM2020-3).

### 169 **Study context**

170 We conducted this case study in undergraduate and graduate STEM courses at the  
171 University of California, Merced (UC Merced), a research-intensive, minority-serving institution  
172 (MSI) in the Western United States. This study is part of a larger ongoing research project  
173 funded by two research grants, the Howard Hughes Medical Institute Inclusive Excellence  
174 (HHMI IE) awarded to the biology program and the National Science Foundation Hispanic  
175 Serving Institution (NSF HSI) awarded to the chemistry and biochemistry department, with the  
176 goal of understanding, documenting, planning, and enacting meaningful initiatives to improve  
177 teaching and student learning at UC Merced.



178           We collected COPUS data from at least 11 STEM instructors each semester before the  
179 transition to ERT (Fall 2018 through Spring 2020), during the transition to ERT (Spring 2020),  
180 and/or during the continuation of ERT (Fall 2020 and Spring 2021) (Table 1). To select our  
181 instructors for this study, we pulled participants who were involved in a larger institutional study  
182 on assessing teaching and discourse practices in college STEM classrooms. To recruit  
183 participants for our larger study before the transition to ERT, we identified instructors who: 1)  
184 taught either a lower or upper division undergraduate or graduate STEM course, 2) taught a  
185 lecture course (excluding laboratory, discussion, or seminar courses), 3) taught the course in-  
186 person between two academic years (2018-2019 and 2019-2020) and 4) taught in either the Fall  
187 2018, Spring 2019, Fall 2019, and/or Spring 2020 semesters. To recruit participants during the  
188 transition and continuation of ERT, we identified instructors who taught an introductory biology  
189 or chemistry course via online synchronous instruction (excluded in-person and asynchronous  
190 online instruction). Lund et al. (2015) found that at least two of three successive classroom  
191 observations are necessary to adequately characterize an instructor's teaching practices.  
192 Therefore, instructors interested in participating in participation responded to the invitation by  
193 providing their course number and three potential observation dates during the semester.

194           Instructors taught mainly lower division undergraduate courses from a variety of STEM  
195 disciplines, with the majority being in biology or chemistry. All three instructor types from our  
196 institution (tenure-track research faculty, tenure-track teaching faculty, and non-tenure track  
197 contingent faculty (i.e., lecturers) were observed, with the majority being tenure-track research  
198 faculty. Course class sizes ranged from 4 to 292 students, with the mean class size being 110  
199 students. Descriptive information about the instructors and courses included in this study can be  
200 found in Table 1.

201 [Insert Table 1 here]

## 202 **Methods**

### 203 **Data Collection**

204 COPUS documents classroom behaviors in 2-minute intervals throughout the duration of  
205 the class session. There are 25 codes in two categories, one to document what the instructor is  
206 doing and the other to document what the students are doing. Table 2 offers a description of the  
207 COPUS codes: 12 instructors' behaviors, such as *lecturing* and *moving and guiding*, and 13  
208 student behaviors, such as *listening* and *asking questions*. COPUS provides codes which can be  
209 collapsed into many different categories shown in Table 2 (Kranzfelder, Lo, et al., 2019; Smith  
210 et al., 2014). Following Smith et al. (2014), we collapsed instructor COPUS codes into four  
211 categories: *Presenting*, *Guiding*, *Administering*, and *Other*. Following Kranzfelder, Lo, et al.  
212 (2019), we collapsed student COPUS codes into four categories: *Receiving*, *Working & Talking*,  
213 *Assessment*, and *Other*.

214 [Insert Table 2 here]

215 Once we transitioned to online instruction, observers continued to code classroom  
216 observations using in-person COPUS code descriptions, taking detailed notes of instructor  
217 behaviors, uses of online functions such as the messaging function, and student behaviors.  
218 Following the observation, observers met for up to 30 minutes to discuss codes and resolve any  
219 inconsistencies among coders until reaching 100% agreement. During this tabulation, coders also  
220 discussed how they coded new online functions or behaviors and their rationale. When coders  
221 came to an agreement on how an online function or behavior should be coded, they brought the  
222 scenario to our research team's weekly meeting for group consensus. Once the entire group came  
223 to a consensus, the online classroom scenario was added to a shared document among the entire

224 research group to record how we coded that scenario for future reference. After a semester of  
225 adapting the original COPUS code descriptions in the online environment, our research team  
226 took all the scenarios we had documented and created our finalized online COPUS, or E-  
227 COPUS, codebook (File S1).

## 228 **Training & Reliability**

229 We trained 15-23 observers for four hours between two training sessions. Each of the two  
230 sessions consists of pre- and post-activities as well as a 45-minute coding activity, which utilizes  
231 in-person lecture recordings from our home institution (File S2). Additionally, we created a  
232 COPUS Frequently Asked Questions (FAQs) to describe in further detail what behaviors we  
233 categorize under different COPUS codes and what codes we pair together when a particular  
234 behavior occurs (File S3, S4). These training sessions follow an adapted and extended version of  
235 the COPUS training in Smith et al. (2013). We adjusted our COPUS training protocol for online  
236 instruction (File S2). Our protocol for E-COPUS training contained all the aspects of the in-  
237 person COPUS training, except the videos utilized in the coding activity included both online  
238 and in-person video recordings from our home institution.

239 To quantify the degree of agreement between 23 observers using E-COPUS for  
240 classroom observations after training, we calculated inter-rater reliability (IRR) using Fleiss'  
241 Kappa at two different points: 1) before coding in-person (File S5) and 2) before coding online  
242 (File S6). Landis and Koch (1977) suggest the following interpretations of Fleiss' Kappa ( $\kappa$ ):  
243 0.0-0.20 poor to slight agreement, 0.21-0.40 fair agreement, 0.41-0.60 moderate agreement,  
244 0.61-0.80 substantial agreement, and 0.81-1.0 almost perfect agreement. Before conducting  
245 COPUS in-person in Spring 2020, we trained 15 SATAL interns until we reached a moderate  
246 kappa average ( $\kappa = 0.56, 7\%$  95% CI: 0.55-0.56) (File S5). Before conducting E-COPUS in Spring

247 2021, we trained 23 SATAL interns reached substantial agreement ( $\kappa = 0.67$ , 95% CI: 0.66-0.67)  
248 (File S6). In addition to obtaining substantial agreement, SATAL interns met for up to 30  
249 minutes after each E-COPUS observation to discuss codes and resolve any inconsistencies  
250 among coders until reaching 100% agreement.

## 251 **Validity**

252 To measure content evidence for validity (Yusoff, 2019), we collected expert feedback on  
253 E-COPUS by consulting a group of STEM educators and discipline-based education researchers  
254 (DBER) at a research-intensive university unrelated to the institution in this study ( $n = 11$ ). The  
255 expert feedback panel activities were organized into two parts. First, we (authors TP and APV)  
256 collectively presented a subset of the instructor and student codes for the panelists to evaluate the  
257 E-COPUS code descriptions. To do this, we showed panelists the original COPUS code  
258 descriptions compared to our E-COPUS code descriptions and asked panelists if 1) these  
259 behaviors were applicable to them in the online environment, 2) if there were any additional  
260 behaviors that they have observed which we should include, and 3) if any of our code  
261 descriptions needed further clarification. Additionally, authors AS and PK were present to take  
262 notes on the feedback. Our original E-COPUS codebook with the feedback from the expert panel  
263 can be found in supplemental materials (File S7). Secondly, we shared online instructor and  
264 student codes with the panelists so that they could match them with sample classroom scenarios  
265 (File S8). To calculate correct responses for the instructor and student matching activity, we  
266 added the number of correct responses for each question and divided the total by the number of  
267 questions. For the instructor matching activity, correct responses averaged 85%, while correct  
268 responses for the student matching activity averaged 93%. These results provided further proof

269 of content evidence for validity for the online student and instructor codes in typical online  
270 classroom scenarios.

271       Following the expert panel validation, we discussed the feedback provided and made  
272 modifications to the E-COPUS code descriptions accordingly. Originally, our E-COPUS  
273 codebook contained the original COPUS descriptions (Smith et al., 2013), our research team's  
274 clarifications of the COPUS code descriptions, as well as our E-COPUS code descriptions. First,  
275 our expert panel suggested we focus our code descriptions on online behaviors, not clarifications  
276 to in-person COPUS codes. We also adjusted the terminology used in the code descriptions to fit  
277 multiple meeting applications, such as Skype or Google Meet, so other institutions could adapt  
278 our codebook even if they used a different application (Tables 2-3).

## 279 **Data Analyses**

280       To understand the differences in instructional practices and student behaviors in the  
281 online environment, we analyzed six instructors who were observed during in-person (Fall 2019)  
282 and continuation of ERT (Fall 2020) (Figures 1-2). We developed pseudonyms that represented  
283 the race and gender for each instructor to keep the instructors de-identified, but still reflect their  
284 demographics. We used the collapsed categories developed by Smith et al. (2014) to compare  
285 instructor's in-person COPUS to the E-COPUS data and Kranzfelder, Lo, et al. (2019) to  
286 compare student's in-person COPUS to the E-COPUS data. To determine any differences among  
287 the collapsed COPUS codes by class format, we followed Smith et al. (2014), Lewin et al.  
288 (2016), and Kranzfelder et al. (2020) to examine the average percentage of COPUS codes  
289 implemented between each instructor's in-person and online class sessions. To do this, we took  
290 the sum of a singular COPUS/E-COPUS code (i.e., *lecturing*) and divided it by the total number  
291 of codes that appeared within the class session.

292 To understand how the online learning environment impacted specific instructor and  
293 student behaviors, we compared Macie’s individual in-person and online instructor and student  
294 behaviors (Figure 3) using the finalized E-COPUS coding scheme (Tables 2-3). Macie was  
295 observed in Fall 2019 (in-person) and in Spring 2021 (online). We selected Macie’s class  
296 sessions for analysis because they had the highest increase in instructor *Guiding* between in-  
297 person and online instruction as shown in Figure 1. To compare Macie’s individual COPUS and  
298 E-COPUS codes, we took the number of two-minute time intervals marked for each individual  
299 code and divided it by the total of two-minute time intervals for the class session (Kranzfelder et  
300 al., 2020; Lewin et al., 2016; Lund et al., 2015). This calculation overestimates the time spent on  
301 a particular code as the behavior is counted for the entire two-minute interval even if the  
302 instructor only spends a few seconds on it.

## 303 **Results**

### 304 **Instructor E-COPUS Code Descriptions**

305 We adjusted six of the twelve original instructor COPUS code descriptions to document  
306 the teaching behaviors we observed in the online learning environment as illustrated in Table 3.  
307 We did not change any of the original COPUS codes, but rather adjusted their descriptions to fit  
308 the online learning environment. Most adjustments to the in-person COPUS code descriptions  
309 were the result of new online functions, such as breakout rooms, polling, and the chat. Tables 3  
310 and 4 present E-COPUS codes and code descriptions for instructor and student behaviors,  
311 respectively. To make our E-COPUS code descriptions more inclusive for other meeting  
312 software programs, we used the terms “messaging function” and “chat function”  
313 interchangeably. See Supplementary Materials for full descriptions of the codebook, which  
314 includes inclusion and exclusion criteria for instructor and student behaviors (File S9-S10).

315 [Insert Table 3 here]

316 **Breakout Rooms**

317 Moving and Guiding (MG)

318 We changed the code description for *moving and guiding* by adding newly observed  
319 behaviors as well as excluded behaviors that no longer fit in the online learning environment. In  
320 the online environment, instructors could no longer physically move around the classroom, so we  
321 utilized this code when the instructor moved in and out of breakout rooms and guided students in  
322 their active learning activity. We also found instructors engaged in *moving and guiding*  
323 behaviors without having to move throughout breakout rooms. For example, we also coded  
324 *moving and guiding* when an instructor assigned an active learning activity and provided  
325 students hints to answer a problem or showed students how to solve the problem as they were  
326 working on it. We agreed that this was also a *moving and guiding* behavior even though the  
327 instructor did not create breakout rooms because they were still guiding students in an active  
328 learning activity (Table 3).

329 One-on-One (1o1)

330 We changed the code description for *one-on-one* in the online learning environment.  
331 Specifically, it occurred when the instructor was moving between breakout rooms and staying  
332 with one group for an extended period of time. This behavior would be similar to the instructor  
333 walking around the classroom and spending extended time with student groups during group  
334 work.

335 Administration (Adm)

336 We adjusted the description of *administration* to include scenarios that we frequently  
337 encountered in the online learning environment, like assigning breakout rooms or assigning an

338 individual thinking question that was not a *clicker question*, such as a think-pair-share. While  
339 these behaviors could be interpreted in the “etc.” of the original description, we included them to  
340 ensure consensus of coding these behaviors during observations.

### 341 **Polling**

#### 342 Clicker Question (CQ)

343       Next, for the *clicker question* code description, we added online functions that appeared  
344 in the online learning environment. The most prominent online activity we observed were online  
345 polls, such as those used on Zoom or third-party sites, such as Poll Everywhere, Socrative, or  
346 Mentimeter, which we coded as a *clicker question*. While not identical, online polls allowed  
347 students to individually think and submit their answer to a multiple-choice question as well as  
348 see the distribution of student responses, like a *clicker question*.

### 349 **Chat**

#### 350 Posing a Question (PQ) and Instructor Answering Questions (AnQ)

351       Lastly, for the codes *posing a question* and *answering questions*, we found that the chat  
352 function allowed instructors to ask and answer questions in two ways: verbally or written  
353 through the chat. Therefore, we slightly changed these code descriptions to include both  
354 modalities.

### 355 **Student E-COPUS Code Descriptions**

356       We adjusted six of the thirteen COPUS code descriptions to document the teaching  
357 behaviors we observed in the online learning environment as illustrated in Table 4. While most  
358 student codes were easily adaptable to the online environment, some codes required more  
359 adjustments. Most of these code descriptions were adapted to include the online functions used



360 in online instruction, such as the chat, as well as any new behaviors that emerged because of the  
361 implementation of these functions.

362 [Insert Table 4 here]

### 363 **Breakout Rooms**

#### 364 Group Clicker Question, Group Worksheet, and Other Group Work (CG, WG, and OG)

365 In the online learning environment, we found group work could be seen in two ways: 1)  
366 when the instructor assigned students to work on an active learning activity in breakout rooms, or  
367 2) when students engaged in group work by discussing an active learning activity in the chat  
368 without instructor facilitation. For example, in one observation a group of five students used the  
369 chat to work on a clicker question together without any instructor intervention. Since this  
370 discussion was not facilitated by the instructor, we concluded it was not a *whole class discussion*,  
371 but instead a *group clicker question*.

### 372 **Chat**

#### 373 Student Answering Questions (AnQ)

374 The code description for *answering questions* includes all the ways that students could  
375 answer a question in the online learning environment. The first and most direct way a student  
376 could answer a question posed by the instructor was by responding verbally while the rest of the  
377 class was listening. The second way a student could answer a question posed by the instructor  
378 was by using the chat function, available for everyone in the class to read, which is like the rest  
379 of the class listening as the original code stated. However, in some observations, we noticed that  
380 some students' responses in the chat were unnoticed by the instructor. Furthermore, while it was  
381 possible for students to answer an instructor's question through private messaging, observers  
382 were unable to see these responses. Therefore, the description to the code *answering questions*

383 was adjusted to explicitly state “student answering a question posed by the instructor using the  
384 microphone or chat function *and* the instructor acknowledges the answer with the rest of the  
385 class listening.” Additionally, we noticed that throughout the class session some students would  
386 ask and respond to each other’s questions, sometimes without the instructor’s intervention. To  
387 acknowledge that these students received an answer to their questions, we deemed it appropriate  
388 to code *answering questions* and added “or student answering another students’ question using  
389 the chat function” to the code description.

#### 390 Whole Class Discussion (WC)

391 The online learning environment allowed for students to be involved in a *whole class*  
392 *discussion* utilizing different functions, including the chat, writing, or drawing function. If  
393 multiple students answered an instructor’s question using the chat, writing, or drawing function,  
394 then we coded *whole class discussion*. For example, if the instructor asked the class to use the  
395 drawing function to draw a cell structure on a slide, then observers coded it as *whole class*  
396 *discussion*. Another example of a *whole class discussion* would be if the instructor posed a  
397 question the class and multiple students responded in the chat.

#### 398 Student Question (SQ)

399 The description for the code *student question* was slightly altered to account for the  
400 modalities which a student could ask a question in the online environment: verbally or through  
401 the chat function. Like *answering questions*, students could ask the instructor questions through  
402 the private chat; however, observers are unable to see the behaviors unless the instructor  
403 explicitly acknowledges they received a private message with a question. Additionally, the  
404 original code description for *student question* did not specify that the whole class must be  
405 listening, unlike the original code description for *answering questions*. Therefore, regardless of

406 whether the instructor acknowledged a students' question, we used *student question* to code this  
407 behavior.

408 **All instructors implemented less *Presenting* practices and more *Administering* during**  
409 **online instruction**

410 We found that all six instructors on average *Presented* less and *Administered* more in the  
411 online learning environment (Figure 1). For example, during in-person instruction, most of  
412 Macie's class consisted of *Presenting* (65%), while including some *Guiding* practices (32%) and  
413 very little time spent *Administering* (2.2%). However, during online instruction, Macie's  
414 teaching behaviors almost inverted; most of her behaviors were now *Guiding* practices (71%)  
415 with some *Presenting* (23%) and a bit more *Administering* (5.5%) practices. Additionally, most  
416 instructors (67%) had a higher average of *Guiding* practices during online instruction. However,  
417 this was not true for all our instructors. During in-person instruction, most of Jaqueline's  
418 behaviors were *Guiding* (55%) and some *Presenting* (39%). In the online learning environment,  
419 Jaqueline used almost as much *Presenting* (37%) practices as she did *Guiding* (38%) practices.  
420 This tells us that our instructors adapted to the online learning environment differently; while all  
421 instructors *Presented* less, this may not have been an intentional practice. For instance, if  
422 instructors had to explain to students how to complete their assignments online, then they had to  
423 incorporate more *Administering* practices, instead of purposefully intending to reduce their  
424 *Presenting* practices. However, as most instructors incorporated more *Guiding* activities, this led  
425 to more student participation in their class sessions. Mean percentages for all instructors  
426 collapsed COPUS codes can be found in File S11.

427 [Insert Figure 1 here]

428 **Students who engaged in more *Working and Talking* behaviors had instructors who**  
429 **implemented more *Guiding* practices in the online learning environment**

430 We found that students were *Working & Talking* more in the online learning environment  
431 if their instructor incorporated more *Guiding* practices (Figure 2). For example, in the online  
432 learning environment, Marino's class sessions consisted of mostly *Guiding* practices (50%), and  
433 as a result his students *Working & Talking* behaviors were also most of the class time (57%).  
434 However, even the instructors who used less *Guiding* practices in the online learning  
435 environment had high *Working & Talking* behaviors. For example, during online instruction  
436 Patrisia *Guided* less (42%) compared to in-person instruction (50%), but her student *Working &*  
437 *Talking* behaviors remained almost the same in online instruction (51%). Therefore, we  
438 interpreted that students had more opportunities in the online learning environment to be able to  
439 participate in *Working & Talking* behaviors even if they weren't facilitated by the instructor,  
440 such as using the chat to solve problems amongst multiple students. Mean percentages for all  
441 student collapsed COPUS codes can be found in File S12.

442 [Insert Figure 2 here]

443 **Macie spent more class time on *clicker questions, follow-up, and moving and guiding* in the**  
444 **online learning environment**

445 To showcase how online instruction and online functions shifted the use of specific  
446 teaching and learning practices, we took a closer look at Macie's individual COPUS and E-  
447 COPUS codes (Figure 3). Looking at Figure 3A, we see that Macie spent more class time on five  
448 of the six *Guiding* codes in the online learning environment compared to in-person instruction:  
449 *follow-up, posing a question, clicker question, answering questions, and moving and guiding*.  
450 During in-person instruction, Macie spent about 6% of her class time on *clicker questions*, while

451 during online instruction Macie spent 16% of her class time on *clicker questions*. This could be  
452 because clicker questions were already formatted to be administered online; therefore, it was a  
453 somewhat easy *Guiding* practice for instructors, such as Macie, to implement in the online  
454 learning environment. Following *clicker question, follow-up* was the next *Guiding* code that  
455 Macie spent more class time on in the online learning environment. During in-person instruction,  
456 Macie spent an average of 4% of class time on *follow-up*, while during online instruction she  
457 spent an average of 12% of class time on *follow-up*. Since Macie incorporated more *clicker*  
458 *questions* in the online learning environment, she also spent more time explaining student  
459 responses and correct answers, which is considered *follow-up*. Penultimately, Macie spent 3% of  
460 the class time *moving and guiding* students in active learning activities during in-person  
461 instruction, but online she spent an average of 11%. During *clicker questions*, Macie spent more  
462 time *guiding* her students in this active learning activity by providing them hints and tips to solve  
463 the problem, which is considered a *moving and guiding* behavior. We interpret this to mean that  
464 Macie took advantage of the online learning environment and purposefully shifted her teaching  
465 practices from teacher-centered to more student-centered approaches. Mean percentages for  
466 Macie's individual instructor COPUS codes can be found in File S13.

467 **Macie's students spent more class time engaged in *individual thinking, answering questions,***  
468 **and *whole class discussions* in the online learning environment**

469 Looking at Figure 3B, Macie's students also spent more class time on *Working & Talking*  
470 behaviors during online instruction. More specifically, Macie's students spent more time doing  
471 *individual thinking*, participating in *whole class discussions*, and *answering questions* online.  
472 During in-person instruction, Macie's students spent an average of 4% of class time on  
473 *individual thinking*, while during online instruction students spent an average of 20% class time

474 on *individual thinking*. This increase in *individual thinking* can easily be explained by the  
475 increased use of *clicker questions*. Additionally, during in-person instruction, Macie's students  
476 spent an average of only 1% of class time on *whole class discussion*, while during online  
477 instruction they spent 14%. These discussions could have naturally emerged as Macie  
478 incorporated more *Guiding* behaviors, such as *follow-up*, or as students had more modalities  
479 available to engage in *whole class discussions*, such as the chat. Overall, we interpret that  
480 students in Macie's online class sessions had more opportunities to engage in active learning  
481 activities as a result of the new online functions, such as polling and the chat. Mean percentages  
482 for Macie's individual student COPUS codes can be found in File S14.

483 [Insert Figure 3 here]

## 484 **Discussion**

485 The transition to ERT revealed innovative teaching practices utilizing different online  
486 functions to engage students in the online learning environment. Our findings suggest that ERT  
487 forced instructors to re-think and re-design their in-person teaching practices to engage students  
488 in the new learning environment. We developed and validated E-COPUS to measure these  
489 teaching practices in the synchronous online format. More specifically, we adapted six instructor  
490 COPUS code descriptions to better represent the observed online teaching practices: *moving and*  
491 *guiding, one-on-one, administering, clicker questions, posing questions, and instructor*  
492 *answering questions*. Moreover, we adapted six student COPUS code descriptions to better  
493 represent the observed online learning behaviors: *student answering questions, whole class*  
494 *discussion, group clicker question, group worksheet, other group work, and student question*.  
495 Our instructors did not demonstrate any new teaching or learning behaviors in the online learning  
496 environment; instead, they adjusted to their in-person teaching practices by utilizing online

497 functions, such as breakout rooms, polling, the chat, and more. For example, our instructors did  
498 not stop *moving and guiding* students once we transitioned to online instruction; but rather, they  
499 adapted to the online environment and utilized the breakout rooms function and moved between  
500 breakout rooms to mimic *moving and guiding* in the in-person environment. Similarly, Rupnow  
501 et al. (2020) found that their instructors adapted their in-person teaching practices to fit the  
502 online learning environment, such as drawing using an annotation function on Microsoft Teams  
503 instead of drawing on a physical whiteboard in-person.

504 **Instructors who *Guided* more in the online environment had increased student *Working***  
505 ***and Talking* behaviors**

506       Regarding our application of E-COPUS, our data showed that our six instructors adapted  
507 their teaching practices in the online learning environment by spending less time on *Presenting*  
508 behaviors and spending more time on *Administering* behaviors (File S11). We can infer that  
509 instructors had to spend more time going over *Administrative* tasks and classroom logistics with  
510 students, such as explaining where to find assignments online or assigning breakout rooms,  
511 which explain why there were less *Presenting* codes for all instructors in the online environment.  
512 Similarly, Perets et al. (2020) assessed student learning experiences before and after ERT  
513 through surveys and found that student engagement decreased when an instructor was lecturing  
514 after transitioning to ERT. Based on the results of Perets et al. (2020), we can infer that  
515 instructors *Presenting* less in the online learning environment allowed the students we studied to  
516 be more engaged in other classroom activities, such as individual and group work in breakout  
517 rooms, in chat, and via polling. Additionally, some adapted more *Guiding* practices in the online  
518 learning environment; for example, *Guiding* practices were higher for Macie, Paige, Daphne, and  
519 Marino after transitioning to synchronous online instruction. While we did not analyze the

520 specific *Guiding* practices implemented by each instructor, we can infer that the online  
521 environment gave them opportunities to incorporate more active learning practices, especially  
522 with the addition of the online functions. Our findings contradict previous studies concluding  
523 that ERT had a negative impact on student engagement (Perets et al., 2020; Reinholz et al., 2020)  
524 and loss of interaction and communication between instructors and their students (Petillion &  
525 McNeil, 2020).

526         Regarding student behaviors, we found that the four instructors who *Guiding* more during  
527 online instruction engaged their students in more *Working & Talking* behaviors. Similarly,  
528 Venton and Pompano (2021b) found that chemistry instructors implementing active learning  
529 activities were highly successful in engaging students and maintaining student attendance in the  
530 online learning environment. More specifically, they found that when students were assigned to  
531 breakout rooms, they were more likely to turn on their cameras and engage with the material and  
532 their peers because they knew their peers were depending on them (Venton & Pompano, 2021a).  
533 Similar to in-person findings in Kranzfelder, Lo, et al. (2019), our data suggest that if instructors  
534 implemented more *Guiding* activities, then students were most likely engaged in more *Working*  
535 *& Talking* behaviors in the online learning environment. Our results are important to show  
536 instructors what online practices effectively engage their students in active learning activities and  
537 what online functions can be used to support the implementation of these activities.

538 **Macie incorporated more *Guiding* and students engaged in more *Working and Talking* in**  
539 **the online learning environment**

540         Based on our E-COPUS findings, Macie spent more class time on *Guiding* behaviors,  
541 including *clicker questions, follow-up, and moving and guiding*. Furthermore, she spent less time  
542 *lecturing* in the online learning environment compared to in-person. During her online class



543 sessions, instructor Macie spent more time *moving and guiding* students in an active learning  
544 activity by providing hints to students as they completed the activity and spent more time  
545 *following-up* with students after *clicker questions* than she did in-person, which led students to  
546 spending more time *individually thinking* online. Our findings are consistent with Baldock et al.  
547 (2021) who also implemented clicker questions in the online learning environment and found  
548 them useful in helping instructors not only provide prompt feedback to students, but also to keep  
549 their engagement high during the class session. Therefore, we can conclude that the online  
550 clicker questions, or the polling function, were effective tools in engaging students in the online  
551 learning environment.

552 Macie's students also spent more time engaged in *Working & Talking* behaviors online.  
553 Macie's students frequently participated in *whole-class discussions* and *answered questions*,  
554 which could be attributed to the online chat function. Similarly, Tan et al. (2020) found that in  
555 their virtual chemistry classroom, the chat was an essential function which allowed their students  
556 to engage in discussions at any time during the class session instead of waiting for the instructor  
557 to pause and allow students to participate in discussion. Therefore, as instructors begin to  
558 transition back to in-person or hybrid instruction, they may consider how implementing online  
559 functions which promote student engagement, such as the chat, can be applied in other teaching  
560 modalities, such as in-person or hybrid instruction.

561 Based on our findings, Macie's data illustrated how the online learning environment and  
562 online functions can provide an opportunity for a classroom to include more *Guiding* and  
563 *Working & Talking* behaviors. In contrast to previous studies which discovered that instructors  
564 used more instructor-centric, lecture-based teaching practices during ERT (Erickson & Wattiaux,  
565 2021), we found that our instructors implemented more student-centric, active learning teaching

566 practices. Although we did not study instructors' perceptions of teaching and learning in this  
567 study, perhaps our instructors' beliefs, values, changed during ERT. Many of our instructors  
568 could have decided that the transition to ERT served as an opportunity to test out new, more  
569 student-centered teaching practices, like individual thinking, clicker questions, or small group  
570 work. During the transition to and the continuation of ERT, our institution offered educational  
571 development opportunities to support instructors as they transitioned to online instruction with  
572 the implementation of evidence-based teaching practices, like active learning for large  
573 enrollment classes. These efforts could have helped our instructors become more skillful and  
574 motivated to implement their teaching practices as observed during ERT.

### 575 **Applications of E-COPUS**

576 The innovative teaching practices and online functions instructors adopted to engage their  
577 students in the online learning environment will persist as instructors teach in different learning  
578 environments. E-COPUS results can benefit instructors, institutional assessment programs, and  
579 biology education researchers in many ways. First, if instructors have previously received in-  
580 person COPUS data, then they can compare their two sets of data to see if and how their teaching  
581 practices have changed between in-person and online instruction. For example, we compared  
582 instructor Macie's in-person and online COPUS data to see that she incorporated more *Guiding*  
583 activities in the online learning environment, which led to her students engaging in more  
584 *Working & Talking* behaviors. Whether this was planned or not, we were able to see the student  
585 behaviors that emerged because of the *Guiding* activities she implemented. When Macie returns  
586 to in-person instruction, she may consider how she can continue to use the same *Guiding*  
587 practices that she utilized online in the in-person learning environment.

588           Additionally, instructors can use their E-COPUS data to explore what online functions or  
589 active learning practices engaged their students in the most *Working and Talking* behaviors. For  
590 example, in Macie’s online learning environment, the chat was crucial to allow students to  
591 engage in frequent *whole class discussions* with their peers. By observing this in the E-COPUS  
592 data, Macie now knows which teaching practices effectively engaged her students in *Working &*  
593 *Talking* behaviors in the online learning environment and may consider implementing a live chat  
594 in her in-person classroom. Instructors across all universities can benefit from E-COPUS data as  
595 it provides them with understanding which online teaching practices engaged students in the  
596 most *Working and talking* behaviors and will allow them to consider if any effective online  
597 practices could be implemented during in-person instruction.

598           As some universities begin to return to in-person instruction, Hybrid, or Hybrid-Flexible  
599 (HyFlex) instruction (Keiper et al., 2020; Kohnke & Moorhouse, 2021; Miller et al., 2020), E-  
600 COPUS and COPUS can be used to record both the online and in-person teaching practices. By  
601 having a standard protocol for both the in-person and online environment, it will allow for  
602 consistent classroom observations between the two class formats. If instructors decide to  
603 incorporate online functions into the in-person learning environment, COPUS and E-COPUS can  
604 be implemented together to document instructor and student behaviors. We hope this tool will  
605 support instructors in understanding and improving their own teaching practices, as well as  
606 provide researchers with a tool that can be used consistently in the online environment.  
607 Furthermore, if universities continue or revert to online instruction in the future, then instructors  
608 can refer to their E-COPUS data to determine what practices were effective for them in the past,  
609 as well as where they can improve. Overall, E-COPUS can be applied to 1) understand the  
610 teaching and learning behaviors instructors adapted during online instruction, 2) how these

611 behaviors changed between in-person and online instruction, and 3) make decisions on what  
612 teaching practices to implement when instructors return to in-person/hybrid instruction, or if  
613 instructors return to online instruction in the future.

#### 614 **Limitations and Future Directions**

615 We acknowledge that there are several factors that limit our study, providing  
616 opportunities for future studies. First, we conducted a convenience sample at one MSI, UC  
617 Merced; therefore, our results have limited generalizability. Our selected participants were  
618 teaching introductory chemistry and biology courses based on the focus of the larger grant-  
619 funded studies, so we did not employ a systemic approach to ensure even distribution of faculty  
620 and students across STEM disciplines at our institution or other institutions. In the future, it  
621 would be interesting to collect E-COPUS data across several universities, especially other MSIs,  
622 to determine if the teaching and learning practices at our institution are similar to others.

623 In addition, we developed E-COPUS while observing instructors using Zoom during  
624 synchronous online instruction; therefore, we did not examine if there were differences in  
625 teaching and learning practices across different meeting software programs, such as Skype or  
626 Google Meet. We recommend future studies utilize E-COPUS to document online behaviors  
627 with other software programs to see if new teaching or learning behaviors emerge, and if our  
628 current code descriptions are applicable outside of the Zoom meeting software program.  
629 Furthermore, we hope that future studies will utilize E-COPUS to document how instructors  
630 incorporate newfound online functions, such as the chat, during in-person instruction.

631 As we continue to assess the online learning environment, E-COPUS could be  
632 complemented by pairing it with other tools to study other variables which influence online  
633 instruction. Teacher discourse moves, or the conversational strategies used by instructors to

634 encourage student engagement in science content (Kranzfelder et al., 2020; Warfa et al., 2014),  
635 has not yet been studied in the online learning environment. Observing instructor discourse  
636 alongside instructor behaviors can reveal the quality of active learning strategies used by  
637 instructors in the online learning environment. For example, instructors may be using student-  
638 centered, *Guiding* teaching practices, but taking a teacher-centered, *authoritative* discourse  
639 approach with their students (Kranzfelder et al., 2020). By pairing E-COPUS with discourse  
640 protocols, such as the Classroom Discourse Observation Protocol (CDOP) (Kranzfelder,  
641 Bankers-Fulbright, et al., 2019), instructors can assess if their teaching practices align with how  
642 they are talking to their students.

643 Finally, we focused on the teaching and learning practices at an MSI, but we did not  
644 study how the different student demographics were impacted by changes in the teaching  
645 practices because of the transition to ERT. In the future, it would be relevant to examine aspects  
646 of equity and inclusion as well as power dynamics in the online environment by taking a closer  
647 look at student behaviors. Based on recent studies, Barber et al. (2021) found that first-  
648 generation and underrepresented minority students were more likely to have limited access to the  
649 internet and computers compared to their white counterparts, suggesting that flexibility on  
650 policies and assignments would create a more equitable online learning environment. Also, Lee  
651 and McCabe (2021) found that male students dominated in-person discussions in science courses  
652 compared to their female counterparts. Furthermore, they found that male students frequently  
653 spoke without raising their hands and used assertive language when speaking (Lee & McCabe,  
654 2021). The online learning environment is unique in that it allows for students to participate  
655 using both the messaging function and verbally, which may lead to female students participating  
656 as frequently as their male counterparts. In the future, we recommend documenting who is

657 talking and students' modes of communication during online, hybrid, and/or in-person  
658 instruction.

## 659 **Funding**

660 This study was funded by the Howard Hughes Medical Institute (HHMI) Award  
661 #GT11066, National Science Foundation Hispanic-Serving Institution (NSF HSI) Award  
662 #1832538, and start-up funding from the Department of Molecular & Cellular Biology at UC  
663 Merced for PK.

## 664 **Acknowledgments**

665 We would like to thank all the instructors who welcomed us into their classrooms. We  
666 would also like to thank all the SATAL interns for their contributions to COPUS data collection  
667 and brainstorming E-COPUS code descriptions: Andrea Alvarez Gallardo, Ashley Argueta,  
668 Ayooluwa Babalola, Gurpinder Bahia, Avreen Bal, Guadalupe Covarrubias-Oregel, Sandy  
669 Dorantes, Dafne Garcia, Jesus Lopez Lopez, Matias Lopez, Stephanie Medina, Andrew Olmeda  
670 Juarez, Sara Patino, Monica Ramos, Simrandip Sandhu, Kim Ta, Christian Urbina, Shaira  
671 Vargas, Abrian Villalobos, Riley Whitmer, and Isabella Woodruff. Special thanks to members of  
672 the Schuchardt and Warfa research teams at the University of Minnesota for their valuable input  
673 as our expert panel feedback and manuscript revisions.

674

## References

- AAAS. (2019). American Association for the Advancement of Science 2019 Annual Meeting Program. *Science*, 363(6424), 299-308.
- Akiha, K., Brigham, E., Couch, B. A., Lewin, J., Stains, M., Stetzer, M. R., Vinson, E. L., & Smith, M. K. (2018). What types of instructional shifts do students experience? Investigating active learning in science, technology, engineering, and math classes across key transition points from middle school to the university level. *Frontiers in Education*,
- Armbruster, P., Patel, M., Johnson, E., & Weiss, M. (2009). Active learning and student-centered pedagogy improve student attitudes and performance in introductory biology. *CBE—Life Sciences Education*, 8(3), 203-213.
- Asai, D. J. (2020). Race matters. *Cell*, 181(4), 754-757.
- Baldock, B. L., Fernandez, A. L., Franco, J., Provencher, B. A., & McCoy, M. R. (2021). Overcoming the Challenges of Remote Instruction: Using Mobile Technology to Promote Active Learning. *Journal of Chemical Education*, 98(3), 833-842.
- Barber, P. H., Shapiro, C., Jacobs, M. S., Avilez, L., Brenner, K. I., Cabral, C., Cebreros, M., Cosentino, E., Cross, C., & Gonzalez, M. L. (2021). Disparities in Remote Learning Faced by First-Generation and Underrepresented Minority Students during COVID-19: Insights and Opportunities from a Remote Research Experience. *Journal of microbiology & biology education*, 22(1), ev22i21. 2457.
- Beatty, B. J. (2019). Hybrid-flexible course design. *Implementing studentdirected hybrid classes. Provo, Utah: EdTech Books.*
- Bransford, J., Bransford, J. D., Brown, A. L., & Cocking, R. R. (1999). *How people learn: Brain, mind, experience, and school.* National Academies Press.
- Chi, M. T. H., & Wylie, R. (2014, 2014/10/02). The ICAP framework: Linking cognitive engagement to active learning outcomes. *Educational Psychologist*, 49(4), 219-243. <https://doi.org/10.1080/00461520.2014.965823>
- Chickering, A. W., & Gamson, Z. F. (1987). Seven principles for good practice in undergraduate education. *AAHE bulletin*, 3, 7.
- Christianson, A. M. (2020, 2020/09/08). Using Socratic Online Polls for Active Learning in the Remote Classroom. *Journal of Chemical Education*, 97(9), 2701-2705. <https://doi.org/10.1021/acs.jchemed.0c00737>
- Clark, R. M., Besterfield-Sacre, M., & Dukes, A. (2020). Supportive Classroom Assessment for Remote Instruction. *Advances in Engineering Education*, 8(4), n4.

- Crouch, C. H., & Mazur, E. (2001). Peer instruction: Ten years of experience and results. *American Journal of Physics*, 69(9), 970-977.
- Davis, K. S., & Snyder, W. (2012). Fostering science education in an online environment: Are we there yet. *Journal of College Science Teaching*, 42(2), 24-31.
- Denaro, K., Sato, B., Harlow, A., Aebersold, A., & Verma, M. (2021). Comparison of Cluster Analysis Methodologies for Characterization of Classroom Observation Protocol for Undergraduate STEM (COPUS) Data. *CBE—Life Sciences Education*, 20(1), ar3.
- Dingwall, S. (2020). Lessons Learned from Active Engagement in a Large-Enrollment Introductory Biochemistry Course during a Remote Quarter. *Journal of Chemical Education*, 97(9), 2749-2753.
- Driessen, E. P., Knight, J. K., Smith, M. K., & Ballen, C. J. (2020). Demystifying the meaning of active learning in postsecondary biology education. *CBE—Life Sciences Education*, 19(4), ar52.
- Ebert-May, D., Derting, T. L., Hodder, J., Momsen, J. L., Long, T. M., & Jardeleza, S. E. (2011). What we say is not what we do: Effective evaluation of faculty professional development programs. *BioScience*, 61(7), 550-558.
- Eddy, S. L., Converse, M., & Wenderoth, M. P. (2015, September 21, 2015). PORTAAL: A Classroom Observation Tool Assessing Evidence-Based Teaching Practices for Active Learning in Large Science, Technology, Engineering, and Mathematics Classes. *CBE-Life Sciences Education*, 14(2), ar23. <https://doi.org/10.1187/cbe.14-06-0095>
- Erickson, M., & Wattiaux, M. A. (2021). Practices and perceptions at the COVID-19 transition in undergraduate animal science courses. *Natural Sciences Education*, 50(1).
- Freeman, S., Eddy, S. L., McDonough, M., Smith, M. K., Okoroafor, N., Jordt, H., & Wenderoth, M. P. (2014). Active learning increases student performance in science, engineering, and mathematics. *Proceedings of the National Academy of Sciences*, 111(23), 8410-8415.
- Giordano, A. N., & Christopher, C. R. (2020). Repurposing best teaching practices for remote learning environments: chemistry in the news and Oral examinations during COVID-19. *Journal of Chemical Education*, 97(9), 2815-2818.
- Hake, R. R. (1998). Interactive-engagement versus traditional methods: A six-thousand-student survey of mechanics test data for introductory physics courses. *American journal of Physics*, 66(1), 64-74.
- Heiss, E. M., & Oxley, S. P. (2021, 2021/02/01). Implementing a flipped classroom approach in remote instruction. *Analytical and Bioanalytical Chemistry*, 413(5), 1245-1250. <https://doi.org/10.1007/s00216-020-03147-w>



- Johnston, J., Killion, J., & Oomen, J. (2005). Student satisfaction in the virtual classroom. *Internet Journal of Allied Health Sciences and Practice*, 3(2), 6.
- Juan, A. A., Steegmann, C., Huertas, A., Jesus Martinez, M., & Simosa, J. (2011). Teaching mathematics online in the European Area of Higher Education: an instructor's point of view. *International Journal of Mathematical Education in Science and Technology*, 42(2), 141-153.
- Keiper, M. C., White, A., Carlson, C. D., & Lupinek, J. M. (2020). Student perceptions on the benefits of Flipgrid in a HyFlex learning environment. *Journal of Education for Business*, 1-9.
- Knight, J. K., & Wood, W. B. (2005). Teaching more by lecturing less. *Cell biology education*, 4(4), 298-310.
- Kohnke, L., & Moorhouse, B. L. (2021). Adopting HyFlex in higher education in response to COVID-19: students' perspectives. *Open Learning: The Journal of Open, Distance and e-Learning*, 1-14.
- Kranzfelder, P., Bankers-Fulbright, J. L., García-Ojeda, M. E., Melloy, M., Mohammed, S., & Warfa, A.-R. M. (2019). The Classroom Discourse Observation Protocol (CDOP): A quantitative method for characterizing teacher discourse moves in undergraduate STEM learning environments. *PLoS One*, 14(7), e0219019.
- Kranzfelder, P., Bankers-Fulbright, J. L., García-Ojeda, M. E., Melloy, M., Mohammed, S., & Warfa, A.-R. M. (2020). Undergraduate Biology Instructors Still Use Mostly Teacher-Centered Discourse Even When Teaching with Active Learning Strategies. *BioScience*, 70(10), 901-913. <https://doi.org/https://doi.org/10.1093/biosci/biaa077>
- Kranzfelder, P., Lo, A. T., Melloy, M. P., Walker, L. E., & Warfa, A.-R. M. (2019). Instructional practices in reformed undergraduate STEM learning environments: a study of instructor and student behaviors in biology courses. *International Journal of Science Education*, 41(14), 1944-1961.
- Landis, J. R., & Koch, G. G. (1977). An application of hierarchical kappa-type statistics in the assessment of majority agreement among multiple observers. *Biometrics*, 363-374.
- Lee, J. J., & McCabe, J. M. (2021). Who Speaks and Who Listens: Revisiting the Chilly Climate in College Classrooms. *Gender & Society*, 35(1), 32-60.
- Lewin, J. D., Vinson, E. L., Stetzer, M. R., & Smith, M. K. (2016). A campus-wide investigation of clicker implementation: The status of peer discussion in STEM classes. *CBE—Life Sciences Education*, 15(1), ar6.

- Lund, T. J., Pilarz, M., Velasco, J. B., Chakraverty, D., Rosploch, K., Undersander, M., & Stains, M. (2015). The best of both worlds: Building on the COPUS and RTOP observation protocols to easily and reliably measure various levels of reformed instructional practice. *CBE—Life Sciences Education*, 14(2), ar18.
- Maciejewski, W. (2016). Flipping the calculus classroom: an evaluative study. *Teaching Mathematics and its Applications: An International Journal of the IMA*, 35(4), 187-201.
- Mayer, R. E. (2005). Cognitive theory of multimedia learning. *The Cambridge handbook of multimedia learning*, 41, 31-48.
- Miller, A. N., Sellnow, D. D., & Strawser, M. G. (2020). Pandemic pedagogy challenges and opportunities: instruction communication in remote, HyFlex, and BlendFlex courses. *Communication Education*, 1-3.
- National Research Council. (2012). *Discipline-based education research: understanding and improving learning in undergraduate science and engineering* (s). <https://www.nap.edu/catalog/13362/discipline-based-education-research-understanding-and-improving-learning-in-undergraduate>
- Olson, S., & Riordan, D. G. (2012). Engage to Excel: Producing One Million Additional College Graduates with Degrees in Science, Technology, Engineering, and Mathematics. Report to the President. *Executive Office of the President*.
- Ong, M., Wright, C., Espinosa, L., & Orfield, G. (2011). Inside the double bind: A synthesis of empirical research on undergraduate and graduate women of color in science, technology, engineering, and mathematics. *Harvard Educational Review*, 81(2), 172-209.
- Owens, M. T., Seidel, S. B., Wong, M., Bejines, T. E., Lietz, S., Perez, J. R., Sit, S., Subedar, Z.-S., Acker, G. N., & Akana, S. F. (2017). Classroom sound can be used to classify teaching practices in college science courses. *Proceedings of the National Academy of Sciences*, 114(12), 3085-3090.
- Perets, E. A., Chabeda, D., Gong, A. Z., Huang, X., Fung, T. S., Ng, K. Y., Bathgate, M., & Yan, E. C. (2020). Impact of the Emergency Transition to Remote Teaching on Student Engagement in a Non-STEM Undergraduate Chemistry Course in the Time of COVID-19. *Journal of Chemical Education*, 97(9), 2439-2447.
- Petillion, R. J., & McNeil, W. S. (2020). Student experiences of emergency remote teaching: Impacts of instructor practice on student learning, engagement, and well-Being. *Journal of Chemical Education*, 97(9), 2486-2493.
- Prince, M. (2004). Does Active Learning Work? A Review of the Research. *Journal of Engineering Education*, 93(3), 223-231. <https://doi.org/10.1002/j.2168-9830.2004.tb00809.x>

- Rapanta, C., Botturi, L., Goodyear, P., Guàrdia, L., & Koole, M. (2020). Online university teaching during and after the Covid-19 crisis: Refocusing teacher presence and learning activity. *Postdigital Science and Education*, 2(3), 923-945.
- Reinholz, D. L., Stone-Johnstone, A., White, I., Sianez Jr, L. M., & Shah, N. (2020). A Pandemic Crash Course: Learning to Teach Equitably in Synchronous Online Classes. *CBE—Life Sciences Education*, 19(4), ar60.
- Reisner, B. A., Pate, C. L., Kinkaid, M. M., Paunovic, D. M., Pratt, J. M., Stewart, J. L., Raker, J. R., Bentley, A. K., Lin, S., & Smith, S. R. (2020). I've Been Given COPUS (Classroom Observation Protocol for Undergraduate STEM) Data on My Chemistry Class... Now What? *Journal of Chemical Education*, 97(4), 1181-1189.
- Ruiz-Primo, M. A., Briggs, D., Iverson, H., Talbot, R., & Shepard, L. A. (2011). Impact of undergraduate science course innovations on learning. *Science*, 331(6022), 1269-1270.
- Rupnow, R. L., LaDue, N. D., James, N. M., & Bergan-Roller, H. E. (2020). A perturbed system: How tenured faculty responded to the COVID-19 shift to remote instruction. *Journal of Chemical Education*, 97(9), 2397-2407.
- Sawada, D., Piburn, M. D., Judson, E., Turley, J., Falconer, K., Benford, R., & Bloom, I. (2002). Measuring reform practices in science and mathematics classrooms: the reformed teaching observation protocol. *School Science and Mathematics*, 102(6), 245-253. <https://doi.org/10.1111/j.1949-8594.2002.tb17883.x>
- Singer, S., & Smith, K. A. (2013). Discipline-based education research: Understanding and improving learning in undergraduate science and engineering. *Journal of engineering education*, 102(4), 468-471.
- Singhal, M. K. (2020). Facilitating virtual medicinal chemistry active learning assignments using advanced Zoom features during COVID-19 campus closure. *Journal of Chemical Education*, 97(9), 2711-2714.
- Skylar, A. A. (2009). A comparison of asynchronous online text-based lectures and synchronous interactive web conferencing lectures. *Issues in Teacher education*, 18(2), 69-84.
- Smith, K. A., Sheppard, S. D., Johnson, D. W., & Johnson, R. T. (2005). Pedagogies of engagement: Classroom-based practices. *Journal of engineering education*, 94(1), 87-101.
- Smith, M. K., Jones, F. H. M., Gilbert, S. L., & Wieman, C. E. (2013, December 21, 2013). The Classroom Observation Protocol For Undergraduate Stem (COPUS): A new instrument to characterize university STEM classroom practices. *CBE-Life Sciences Education*, 12(4), 618-627. <https://doi.org/10.1187/cbe.13-08-0154>

Smith, M. K., Vinson, E. L., Smith, J. A., Lewin, J. D., & Stetzer, M. R. (2014). A campus-wide study of STEM courses: New perspectives on teaching practices and perceptions. *CBE—Life Sciences Education*, 13(4), 624-635.

Stains, M., Harshman, J., Barker, M. K., Chasteen, S. V., Cole, R., DeChenne-Peters, S. E., Eagan, M., Esson, J. M., Knight, J. K., & Laski, F. A. (2018). Anatomy of STEM teaching in North American universities. *Science*, 359(6383), 1468-1470.

Tan, H. R., Chng, W. H., Chonardo, C., Ng, M. T. T., & Fung, F. M. (2020). How chemists achieve active learning online during the COVID-19 pandemic: using the Community of Inquiry (CoI) framework to support remote teaching. *Journal of Chemical Education*, 97(9), 2512-2518.

Tomkin, J. H., Beilstein, S. O., Morphew, J. W., & Herman, G. L. (2019). Evidence that communities of practice are associated with active learning in large STEM lectures. *International Journal of STEM Education*, 6(1), 1-15.

University of California Davis. (2018). *Generalized Observation and Reflection Platform (GORP)*. Retrieved July 5, 2021 from <https://cee.ucdavis.edu/GORP>

Van der Lans, R. M., Van de Grift, W. J., & van Veen, K. (2018). Developing an instrument for teacher feedback: using the rasch model to explore teachers' development of effective teaching strategies and behaviors. *The journal of experimental education*, 86(2), 247-264.

Van Heuvelen, K. M., Daub, G. W., & Ryswyk, H. V. (2020). Emergency Remote Instruction during the COVID-19 Pandemic Reshapes Collaborative Learning in General Chemistry. *Journal of Chemical Education*, 97(9), 2884-2888.

Venton, B. J., & Pompano, R. R. (2021a, 2021/03/01). Strategies for enhancing remote student engagement through active learning. *Analytical and Bioanalytical Chemistry*, 413(6), 1507-1512. <https://doi.org/10.1007/s00216-021-03159-0>

[Record #48 is using a reference type undefined in this output style.]

Warfa, A.-R. M., Roehrig, G. H., Schneider, J. L., & Nyachwaya, J. (2014). Role of teacher-initiated discourses in students' development of representational fluency in chemistry: A case study. *Journal of Chemical Education*, 91(6), 784-792.

Yang, D. (2017, 2017/12/29). Instructional strategies and course design for teaching statistics online: perspectives from online students. *International journal of STEM education*, 4(1), 34. <https://doi.org/10.1186/s40594-017-0096-x>

Youmans, M. K. (2020). Going remote: How teaching during a crisis is unique to other distance learning experiences. *Journal of Chemical Education*, 97(9), 3374-3380.

Yusoff, M. S. B. (2019). ABC of content validation and content validity index calculation.  
*Resource, 11*(2), 49-54.

## Figure Legends

**Figure 1.** A comparison of the average percentage of collapsed instructor COPUS codes of three different class sessions from six STEM instructors during in-person and online instruction.

**Figure 2.** A comparison of the average percentage of collapsed student COPUS codes of three different class sessions from six STEM instructors during in-person and online instruction.

**Figure 3.** A comparison of the average percentage of two-minute time intervals spent on individual instructor and student COPUS/E-COPUS codes from one STEM instructor (Macie) across three different class sessions during in-person and online instruction. The collapsed student and instructor COPUS codes are color coded following Figures 1-2 for comparison.

**Table 1.** Instructor and course demographics

| Characteristics             | In-person               |             | Remote    |             |
|-----------------------------|-------------------------|-------------|-----------|-------------|
|                             | Fall 2018 – Spring 2020 | Spring 2020 | Fall 2020 | Spring 2021 |
| <b>Discipline</b>           |                         |             |           |             |
| Biology                     | 16                      | 9           | 6         | 7           |
| Chemistry                   | 9                       | 1           | 5         | 5           |
| Mathematics                 | 4                       | 4           | 0         | 0           |
| Physics                     | 4                       | 2           | 0         | 0           |
| Engineering                 | 2                       | 0           | 0         | 0           |
| <b>Instructor type</b>      |                         |             |           |             |
| Research faculty            | 14                      | 8           | 5         | 5           |
| Teaching faculty            | 8                       | 4           | 2         | 3           |
| Lecturers                   | 13                      | 4           | 4         | 4           |
| <b>Course Size</b>          |                         |             |           |             |
| Small ( $\leq 60$ students) | 12                      | 6           | 1         | 1           |
| Medium (61-100 students)    | 3                       | 3           | 0         | 0           |
| Large ( $>101$ students)    | 20                      | 7           | 10        | 11          |
| <b>Class level</b>          |                         |             |           |             |
| Lower division              | 25                      | 9           | 10        | 10          |
| Upper division              | 7                       | 5           | 1         | 1           |
| Graduate                    | 3                       | 2           | 0         | 0           |
| <b>Total</b>                | <b>35</b>               | <b>16</b>   | <b>11</b> | <b>12</b>   |

Note: COPUS data were collected from 40 STEM courses varying in class level, discipline, and course size taught by 35 different instructors who varied in instructor type and discipline. During the transition and continuation of ERT, some instructors from our original sample did not continue their participation in the study, therefore our sample became more limited.

**Table 2. COPUS Coding Scheme**

|                         | <b>Collapsed COPUS Codes</b> | <b>Individual COPUS Codes</b>                                                                                                                                          | <b>COPUS Code Descriptions</b>                                                                                                                                        |
|-------------------------|------------------------------|------------------------------------------------------------------------------------------------------------------------------------------------------------------------|-----------------------------------------------------------------------------------------------------------------------------------------------------------------------|
| <b>Instructor Doing</b> | Presenting                   | Lecturing (Lec)                                                                                                                                                        | Lecturing (presenting content, deriving mathematical results, present a problem solution, etc.)                                                                       |
|                         |                              | Real-time Writing (RtW)                                                                                                                                                | Realtime writing on board, doc. projector, etc. (often checked off with Lec)                                                                                          |
|                         |                              | Demo or Video (D/V)                                                                                                                                                    | Showing or conducting a demo, experiment, simulation, video, or animation                                                                                             |
|                         | Guiding                      | Follow-up (Fup)                                                                                                                                                        | Follow-up/feedback on clicker question or activity to entire class                                                                                                    |
|                         |                              | Posing a question (PQ)                                                                                                                                                 | Posing non-clicker question to students (nonrhetorical)                                                                                                               |
|                         |                              | Clicker question (CQ)                                                                                                                                                  | Asking a clicker question (mark the entire time the instructor is using a clicker question, not just when first asked)                                                |
|                         |                              | Answering questions (AnQ)                                                                                                                                              | Listening to and answering student questions with the entire class listening                                                                                          |
|                         |                              | Moving and guiding (MG)                                                                                                                                                | Moving through class guiding ongoing student work during active learning tasks                                                                                        |
|                         | One on one (1o1)             | One on one extended discussion with one or a few individuals, not paying attention to the rest of the class                                                            |                                                                                                                                                                       |
|                         | Administering                | Administration (Adm)                                                                                                                                                   | Administration (assign homework, return tests, etc.)                                                                                                                  |
| Other                   | Waiting (W)                  | Waiting when there is an opportunity for an instructor to be interacting with or observing/listening to student or group activities and the instructor is not doing so |                                                                                                                                                                       |
|                         | Other (O)                    | Other                                                                                                                                                                  |                                                                                                                                                                       |
| Receiving               | Listening (L)                | Listening to instructor, taking notes, etc.                                                                                                                            |                                                                                                                                                                       |
| <b>Students Doing</b>   | Working and Talking          | Individual (Ind)                                                                                                                                                       | Individual thinking/problem solving. Only mark when an instructor explicitly asks students to think about a clicker question or another question/problem on their own |
|                         |                              | Group Clicker Question (CG)                                                                                                                                            | Discuss clicker question in groups of 2 or more students                                                                                                              |



|           |            |                             |                                                                                                                                     |
|-----------|------------|-----------------------------|-------------------------------------------------------------------------------------------------------------------------------------|
|           |            | Group Worksheet (WG)        | Working in groups on worksheet activity                                                                                             |
|           |            | Other Group Work (OG)       | Other assigned group activity, such as responding to instructor question                                                            |
|           |            | Answering questions (AnQ)   | Student answering a question posed by the instructor with rest of class listening                                                   |
|           |            | Student Question (SQ)       | Student asks question                                                                                                               |
|           |            | Whole class discussion (WC) | Engaged in whole class discussion by offering explanations, opinion, judgment, etc. to whole class, often facilitated by instructor |
|           |            | Prediction (Prd)            | Making a prediction about the outcome of demo or experiment                                                                         |
|           |            | Student Presentation (SP)   | Presentation by student(s)                                                                                                          |
|           | Assessment | Test or Quiz (TQ)           | Test or quiz                                                                                                                        |
|           | Other      | Waiting (W)                 | Waiting (instructor late, working on fixing AV problems, instructor otherwise occupied, etc.)                                       |
| Other (O) |            | Other – explain in comments |                                                                                                                                     |

Note: Descriptions of the instructor collapsed codes adapted from Smith et al. (2014), student collapsed codes from Kranzfelder et al. (2019), and individual COPUS codes and code descriptions from Smith et al. (2013).

**Table 3. E-COPUS Instructor Coding Scheme**

|                            | <b>Individual COPUS Code</b> | <b>In-person COPUS Code Description</b>                                                                                | <b>Online COPUS Code Description</b>                                                                                                                                                                                                                          |
|----------------------------|------------------------------|------------------------------------------------------------------------------------------------------------------------|---------------------------------------------------------------------------------------------------------------------------------------------------------------------------------------------------------------------------------------------------------------|
| <b>Instructor is Doing</b> | Moving and guiding (MG)      | Moving through class guiding ongoing student work during active learning task                                          | Moving through <b>breakout rooms</b> guiding ongoing student work during active learning task <b>or guiding students while they are working on a problem or clicker question (hints/working through a problem) using the microphone or messaging function</b> |
|                            | One-on-one (1o1)             | One on one extended discussion with one or a few individuals, giving undivided attention to one or a group of students | One on one extended discussion with one or a few individuals, giving undivided attention to one or a group of students <b>in a breakout room</b>                                                                                                              |
|                            | Posing a question (PQ)       | Posing non-clicker question to students (non-rhetorical) and waiting for students to respond                           | Posing non-clicker question to students (non-rhetorical) <b>using the microphone or messaging function and</b> waiting for students to respond                                                                                                                |
|                            | Answering questions (AnQ)    | Listening to and answering student questions with the entire class listening                                           | Listening to and answering student questions <b>using the microphone or messaging function</b> with the entire class listening                                                                                                                                |
|                            | Clicker question (CQ)        | Asking a clicker question (mark the entire time the instructor is using a clicker question, not just when first asked) | Asking a clicker question <b>or online poll</b> (mark the entire time the instructor is using a clicker question, not just when first asked)                                                                                                                  |
|                            | Administration (Adm)         | Administration (assign homework, return tests, etc.)                                                                   | Assigning homework, returning tests, <b>class announcements/agenda, assign to breakout rooms, etc.), when the instructor is waiting for students to answer a non-clicker question (i.e., think-pair-share), or administering a test or quiz</b>               |

Note: Descriptions of the in-person COPUS code descriptions adapted from Smith et al. (2013). Modifications to online COPUS code descriptions are noted in bold.

**Table 4. E-COPUS Student Coding Scheme**

|                         | <b>Individual COPUS Code</b> | <b>In-person COPUS Code Description</b>                                                                                             | <b>Online COPUS Code Description</b>                                                                                                                                                                                                                                                                                 |
|-------------------------|------------------------------|-------------------------------------------------------------------------------------------------------------------------------------|----------------------------------------------------------------------------------------------------------------------------------------------------------------------------------------------------------------------------------------------------------------------------------------------------------------------|
| <b>Student is Doing</b> | Answering questions (AnQ)    | Student answering a question posed by the instructor with rest of class listening                                                   | Student answering a question posed by the instructor <b>using the microphone function, reaction function, annotating function, or messaging function and the instructor acknowledges the answer with the rest of the class listening or student answering other students' questions using the messaging function</b> |
|                         | Whole class discussion (WC)  | Engaged in whole class discussion by offering explanations, opinion, judgment, etc. to whole class, often facilitated by instructor | Instructor poses a question or facilitate a whole class discussion in which 2 or more students answer <b>verbally, using messaging function, or drawing function while the rest of the class is listening</b>                                                                                                        |
|                         | Group Clicker Question (CG)  | Discuss clicker question in groups of 2 or more students                                                                            | Discussing clicker question in groups of 2 or more students <b>in breakout rooms or messaging function</b>                                                                                                                                                                                                           |
|                         | Group Worksheet (WG)         | Working in groups on worksheet activity                                                                                             | Working in groups of 2 or more students on worksheet activity <b>in breakout rooms or messaging function</b>                                                                                                                                                                                                         |
|                         | Other Group Work (OG)        | Other assigned group activity, such as responding to instructor question                                                            | Working in groups of 2 or more students on other assigned group activity, such as responding to instructor question <b>in breakout rooms in breakout rooms or messaging function</b>                                                                                                                                 |
|                         | Student Question (SQ)        | Student asks question                                                                                                               | Student asks question <b>using the microphone or messaging function</b>                                                                                                                                                                                                                                              |

Note: Descriptions of the in-person COPUS code descriptions adapted from Smith et al. (2013). Modifications to online COPUS code descriptions are noted in bold.

# Instructor Collapsed COPUS Codes

Presenting Guiding Administering Other

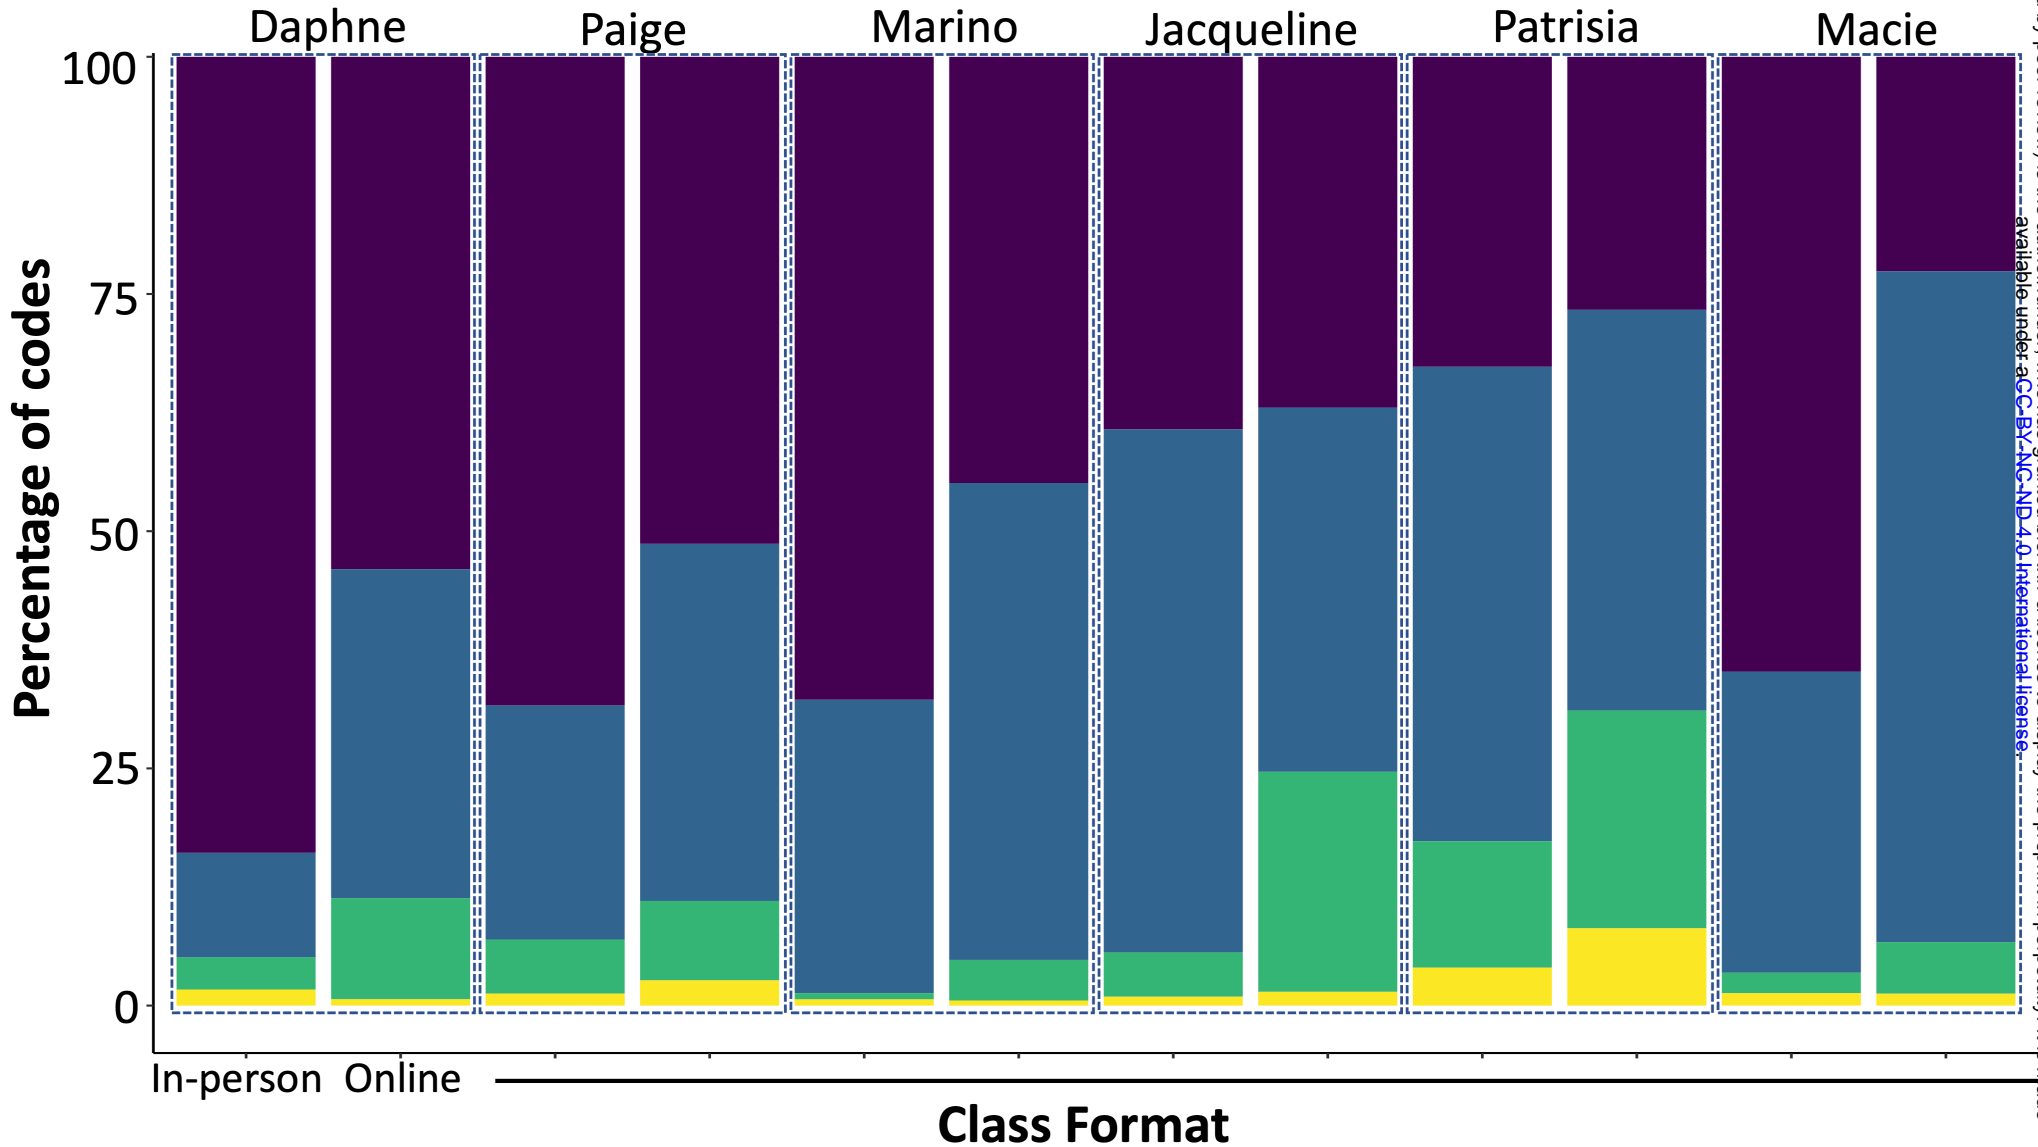

bioRxiv preprint doi: <https://doi.org/10.1101/2021.07.21.453286>; this version posted July 23, 2021. The copyright holder for this preprint (which was not certified by peer review) is the author/funder, who has granted bioRxiv a license to display the preprint in perpetuity. It is made available under aCC-BY-NC-ND 4.0 International license.

# Student Collapsed COPUS Codes

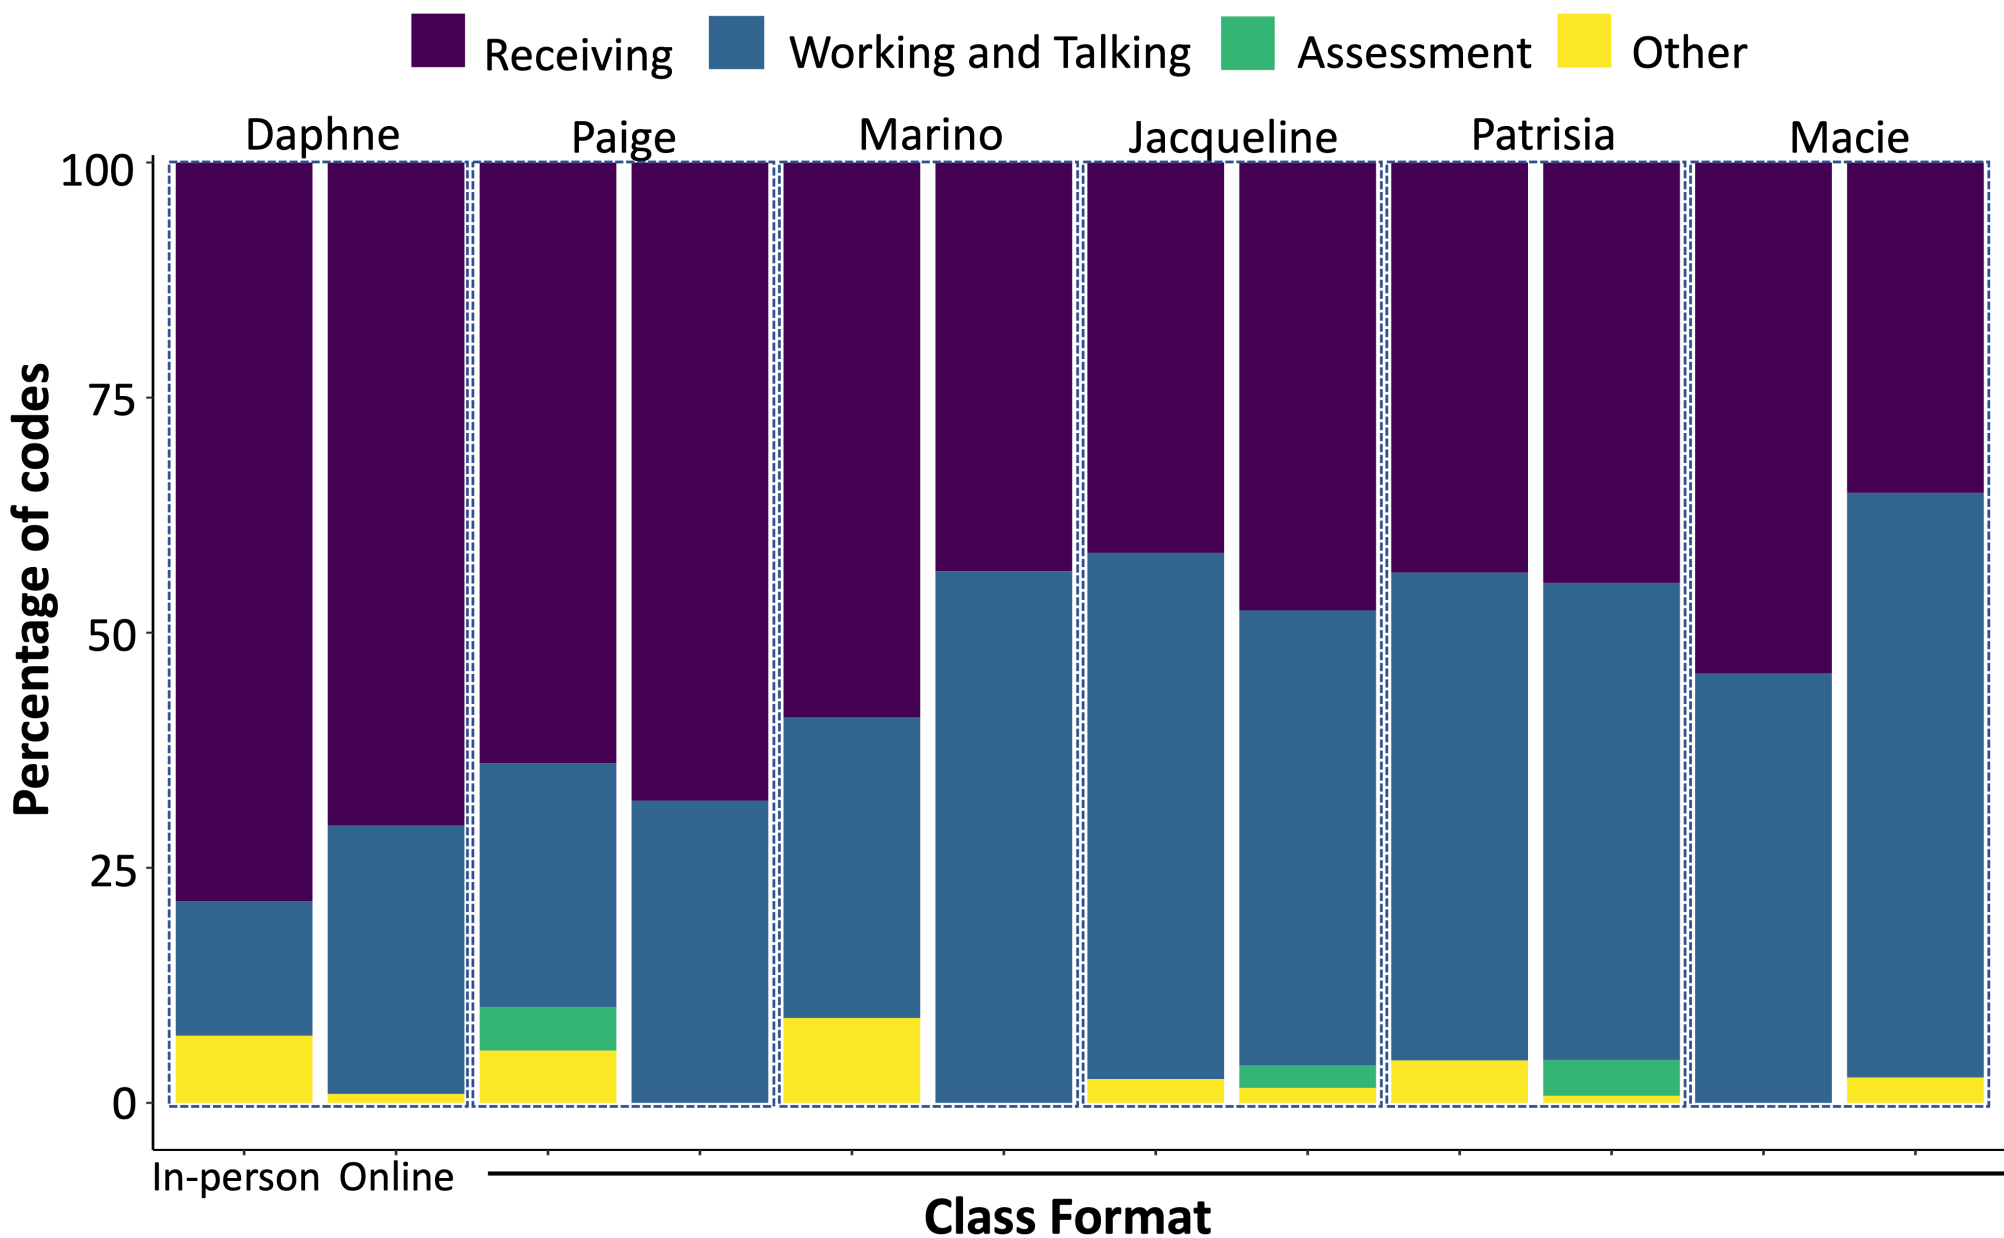

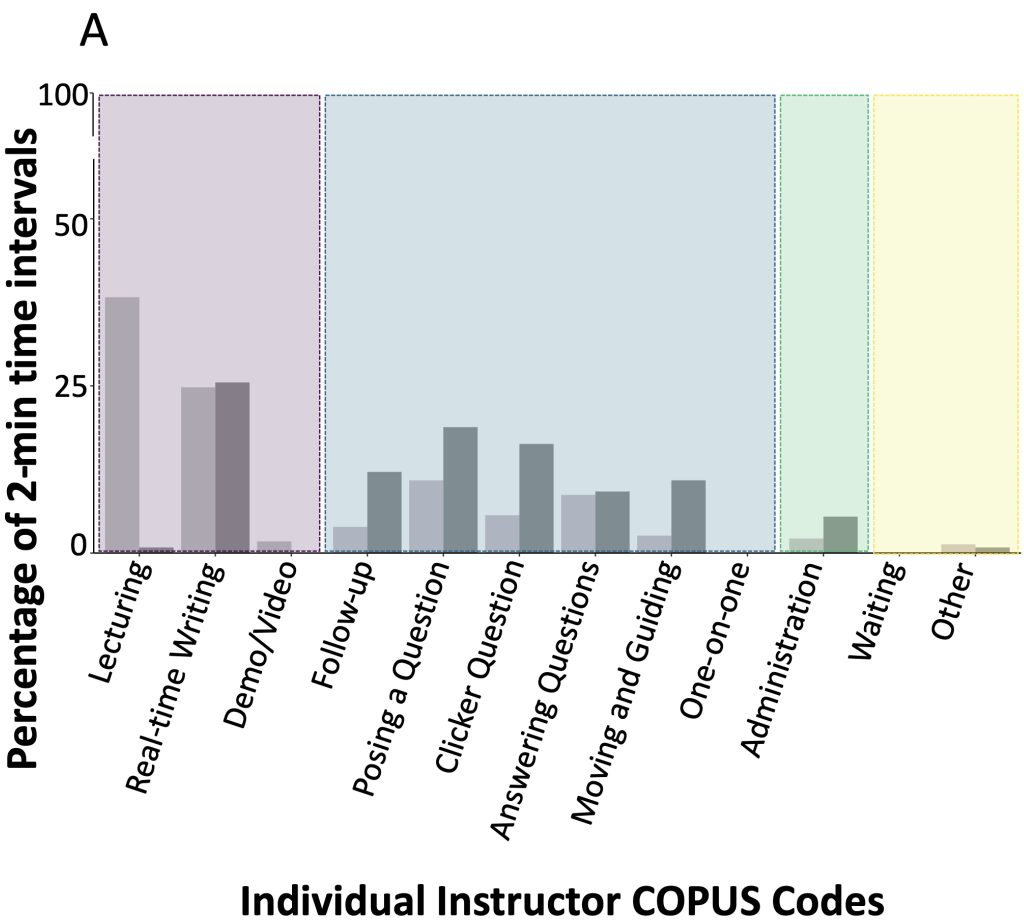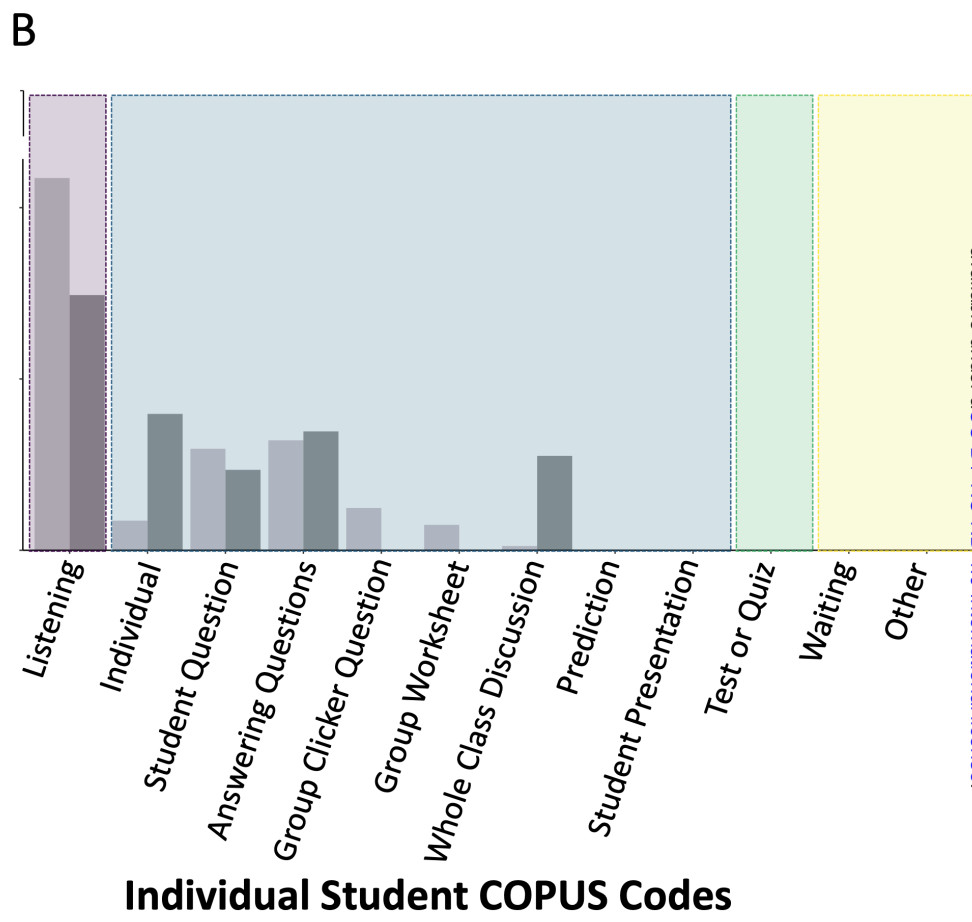

**Class Format**

In-person
  Online
